# Supplementary material
Source: PubMed Central journal article supplement (PMC10369642)
Supplement: mmc1.pdf [file mmc1.pdf]

## *Appendices*

### **Table of Contents**

|                                                                            |   |
|----------------------------------------------------------------------------|---|
| Appendix list of investigators .....                                       | 2 |
| Appendix Table A.1 Radiological findings. ....                             | 3 |
| Appendix Table A.2 Respiratory variables at pulmonologist evaluation ..... | 4 |
| Appendix Table A.3 Laboratory test at evaluation .....                     | 5 |
| Appendix Table A.4 Antiviral treatment .....                               | 6 |
| Appendix Table A.5 Seven-category ordinal scale at 7 and 14 days .....     | 7 |

## Appendix list of investigators

### **Clinical Unit of Internal Medicine, Virgen del Rocio Hospital, Sevilla, Spain**

Rocio Gonzalez-Leon, Veronica Alfaro-Lara, Maximo Bernabeu-Wittel, Aurora Gonzalez-Estrada, Santiago Rodriguez-Suarez, Bosco Baron-Franco, Dolores Nieto-Martin, Juan Delgado, Carlos Hernandez-Quiles, Julia Lanseros-Tenllado, Sonia Gutierrez, Nieves Ramirez-Duque, Manuel Rincon-Gomez, Lourdes Moreno-Gaviño, Fatima Espinosa.

### **Department of Nephrology, Virgen del Rocio Hospital, Sevilla, Spain**

Alejandro Suarez-Benjumea, Carmen Grande- Cabrerizo, Jose Luis Rocha

### **Department of neurology, Virgen del Rocio Hospital, Sevilla, Spain**

Macarena Cabrera, Daniel Macias-Garcia, Maria Dolores Jimenez

### **Department of cardiology, Virgen del Rocio Hospital, Sevilla, Spain**

Nieves Romero-Rodriguez, Almudena Aguilera, Amelia Peña Rodríguez.

### **Department of hepatology, Virgen del Rocio Hospital, Sevilla, Spain**

Javier Ampuero, Teresa Ferrer.

### **Department of rheumatology, Virgen del Rocio Hospital, Sevilla, Spain**

Clara Aguilera

**Appendix Table A.1. Radiological findings.**

| Characteristics                       | All patients<br>(n=24) | No<br>Corticosteroids<br>(n=14) | Corticosteroids<br>(n=10) |
|---------------------------------------|------------------------|---------------------------------|---------------------------|
| Bilateral reticular nodular opacities | 10 (41.7 %)            | 6 (42.9 %)                      | 4 (40 %)                  |
| Ground-glass opacities                | 8 (33.3 %)             | 5 (35.7 %)                      | 3 (30 %)                  |
| Pleural effusion                      | 1 (4.2 %)              | 1 (7.1 %)                       | 0 (0 %)                   |
| Peri-bronchial thickening             | 1 (4.2 %)              | 1 (7.1 %)                       | 0 (0 %)                   |
| Focal consolidation                   | 4 (16.7 %)             | 1 (7.1 %)                       | 3 (30 %)                  |
| Pulmonary edema                       | 4 (16.7 %)             | 1 (7.1 %)                       | 3 (30 %)                  |
| Venous congestion                     | 5 (20.8 %)             | 2 (14.3 %)                      | 3 (30 %)                  |
| Interstitial abnormalities            | 13 (54.2 %)            | 8 (57.1 %)                      | 5 (50 %)                  |
| Atelectasis                           | 1 (4.2 %)              | 0 (0 %)                         | 1 (10 %)                  |

## Appendix Table A.2. Respiratory variables at pulmonologist evaluation

| Characteristics                               | All patients<br>(n=24) | No Corticosteroids<br>(n=14) | Corticosteroids<br>(n=10) |
|-----------------------------------------------|------------------------|------------------------------|---------------------------|
| Respiratory rate                              | 20 (20-23.5)           | 20 (20-22.5)                 | 20 (17-25.3)              |
| Spo <sub>2</sub>                              | 93.5% (90.3-95%)       | 94 (91.8-95%)                | 92 (89.8-96.3)            |
| Fio <sub>2</sub>                              | 52 (41-60)             | 60 (47.5-60)                 | 50 (40-56.3)              |
| Sato <sub>2</sub> : Fio <sub>2</sub>          | 179 (156-217)          | 159 (153-202)                | 189 (173-226)             |
| Estimated Pao <sub>2</sub> : Fio <sub>2</sub> | 214 (195-246)          | 198 (193-234)                | 223 (208-254)             |
| ROX index                                     | 8.3 (7.1-12.4)         | 8.1 (6.7-12)                 | 9.3 (7.1-13.8)            |
| Heart rate                                    | 89.5 (81.3-99.5)       | 90 (84-102.8)                | 88.5 (80.8-92)            |

Spo<sub>2</sub>: peripheral capillary oxygen saturation; Pao<sub>2</sub>: partial pressure of oxygen. Fio<sub>2</sub>: fraction of inspired oxygen; Pao<sub>2</sub>: Fio<sub>2</sub> ratio was assessed indirectly by Sato<sub>2</sub>: Fio<sub>2</sub> ratio, as previously described<sup>1</sup>.

### Appendix Table A.3. Laboratory test at evaluation

| Characteristics                        | All patients<br>(n=24) | No Corticosteroids<br>(n=14) | Corticosteroids<br>(n=10) |
|----------------------------------------|------------------------|------------------------------|---------------------------|
| <b>Laboratory test at evaluation</b>   |                        |                              |                           |
| Sodium, mEq/L (135-145 mEq/L)          | 136 (134-138)          | 138 (136-140)                | 135 (134-136)             |
| White blood cell count, / $\mu$ L      | 7.3 (4.5-10.5)         | 6.2 (4.2-8.5)                | 9.8 (5.4-10.8)            |
| Absolute lymphocyte count, / $\mu$ L   | 0.83 (0.54-1.12)       | 0.83 (0.6-1.11)              | 0.88 (0.45-1.12)          |
| Hemoglobin, g/dL                       | 13.4 (12.5-14.1)       | 13.5 (12.5-14.2)             | 13.2 (12.5-14.3)          |
| Platelet count, $\times 10^3/\mu$ L    | 237 (149-280)          | 181.5 (130.8-252)            | 311.5 (175.3-438)         |
| Neutrophils, $\times 10^9/L$           | 5.52 (3.46-8.81)       | 5.03 (3.28-6.2)              | 7.32 (4.67-9.88)          |
| D-dimer, ng/mL                         | 860 (497.5-1515)       | 735 (420-1485)               | 1050 (782.5-1885)         |
| Creatinine, mg/dL                      | 0.92 (0.72-1.2)        | 0.95 (0.73-1.27)             | 0.9 (0.7-1.1)             |
| Total bilirubin, mg/dL                 | 0.58 (0.39-1.14)       | 0.52 (0.31-1.07)             | 0.6 (0.42-1.2)            |
| Aspartate aminotransferase, U/L (0-30) | 45 (28-67)             | 55 (41-87.8)                 | 27 (21.5-44)              |
| Alanine aminotransferase, U/L (20-40)  | 33 (29-54)             | 44 (29-62.3)                 | 29 (22.5-45)              |
| Ferritine                              | 1473.4 (764.6-2037.5)  | 1847.4 (1442.8-3446.8)       | 1217 (635.8-1769.3)       |
| C-reactive protein, mg/L               | 219.3 (89.4-281.2)     | 238.7 (110.2-271.2)          | 132 (84.9-333.6)          |
| Fibrinogen mg/dL                       | 5.6 (4.7-7.4)          | 5.1 (4.5-7.6)                | 6.8 (4.7-8.2)             |
| Prothrombin Time (seconds)             | 13.8 (12.3-22)         | 14.1 (12.2-24.6)             | 13.4 (13.1-13.8)          |

## Appendix Table A.4. Antiviral treatment

| <b>Characteristics</b> | <b>All patients<br/>(n=24)</b> | <b>No<br/>Corticosteroids<br/>(n=14)</b> | <b>Corticosteroids<br/>(n=10)</b> |
|------------------------|--------------------------------|------------------------------------------|-----------------------------------|
| Lopinavir/Ritonavir    | 24 (100 %)                     | 14 (100 %)                               | 10 (100 %)                        |
| Hidroxicloroquin       | 24 (100 %)                     | 14 (100 %)                               | 10 (100 %)                        |
| IFNB1b                 | 20 (83.3 %)                    | 12 (85.7 %)                              | 8 (80 %)                          |
| Tocilizumab            | 15 (62.5 %)                    | 12 (85.7 %)                              | 3 (30 %)                          |
| Azitromicin            | 19 (79.2 %)                    | 13 (92.9 %)                              | 6 (60 %)                          |

**Appendix Table A.5. Seven-category ordinal scale at 7 and 14 days**

| <b>Characteristics</b>                                                                                   | <b>All patients<br/>(n=24)</b> | <b>No<br/>Corticosteroid<br/>s<br/>(n=14)</b> | <b>Corticosteroids<br/>(n=10)</b> |
|----------------------------------------------------------------------------------------------------------|--------------------------------|-----------------------------------------------|-----------------------------------|
| <b>SEVEN CATEGORY SCALE 7 DAYS (N, %)</b>                                                                |                                |                                               |                                   |
| 1. Not hospitalized with resumption of normal activities.                                                | 0                              | 0                                             | 0                                 |
| 2. Not hospitalized, but unable to resume normal activities.                                             | 2 (8.3 %)                      | 0                                             | 2 (20 %)                          |
| 3. Hospitalized, not requiring supplemental oxygen.                                                      | 0                              | 0                                             | 0                                 |
| 4. Hospitalized, requiring supplemental oxygen.                                                          | 3 (12.5 %)                     | 1 (7.1 %)                                     | 2 (20%)                           |
| 5. Hospitalized, requiring nasal high-flow oxygen therapy, non-invasive mechanical ventilation, or both; | 4 (16.7 %)                     | 0                                             | 4 (40%)                           |
| 6. Hospitalized, requiring ECMO, invasive mechanical ventilation, or both.                               | 14 (58.3 %)                    | 12 (85.7 %)                                   | 2 (20%)                           |
| 7. Death.                                                                                                | 1 (4.2 %)                      | 1 (7.1 %)                                     | 0                                 |
| <b>SEVEN CATEGORY SCALE 14 DAYS (N, %)</b>                                                               |                                |                                               |                                   |
| 1. Not hospitalized with resumption of normal activities.                                                | 1 (4.2 %)                      | 0                                             | 1 (10 %)                          |
| 2. Not hospitalized, but unable to resume normal activities.                                             | 5 (20.8%)                      | 1 (7.1%)                                      | 4 (40%)                           |
| 3. Hospitalized, not requiring supplemental oxygen.                                                      | 1 (4.2%)                       | 0                                             | 1 (10%)                           |
| 4. Hospitalized, requiring supplemental oxygen.                                                          | 4 (16.7%)                      | 2 (14.3 %)                                    | 2 (20 %)                          |
| 5. Hospitalized, requiring nasal high-flow oxygen therapy, non-invasive mechanical ventilation, or both. | 2 (8.3%)                       | 2 (14.3 %)                                    | 0                                 |
| 6. Hospitalized, requiring ECMO, invasive mechanical ventilation, or both.                               | 8 (33.3%)                      | 6 (42.9 %)                                    | 2 (20 %)                          |
| 7. Death.                                                                                                | 3 (12.5%)                      | 3 (21.4%)                                     |                                   |

## REFERENCE

---

<sup>1</sup> Rice TW, Wheeler AP, Bernard GR, Hayden DL, Schoenfeld DA, Ware LB. Comparison of the SpO<sub>2</sub>/FIO<sub>2</sub> Ratio and the PaO<sub>2</sub>/FIO<sub>2</sub> Ratio in Patients With Acute Lung Injury or ARDS. Chest 2007 Aug;132(2):410-7. CHEST, Volume 132, Issue 2, 410 - 417
